# Supplementary material for: In Vitro Bioassay-Guided Identification of Anticancer Properties from Moringa oleifera Lam. Leaf against the MDA-MB-231 Cell Line
Source: MDPI journal article supplement (doi:10.3390/ph13120464), 2020-12-15
Supplement: s1 [file s1]

# In Vitro Bioassay-Guided Identification of Anticancer Properties from *Moringa oleifera* Lam. Leaf against the MDA-MB-231 Cell Line

**Prapakorn Wisitpongpun<sup>1</sup>, Nungruthai Suphrom<sup>2</sup>, Pachuen Potup<sup>1</sup>, Nitra Nuengchamnong<sup>3</sup>, Philip C. Calder<sup>4</sup> and Kanchana Usuwanthim<sup>1,\*</sup>**

<sup>1</sup> Cellular and Molecular Immunology Research Unit (CMIRU), Faculty of Allied Health Sciences, Naresuan University, Phitsanulok 65000, Thailand; prapakornw59@nu.ac.th (P.W.); pachuenp@nu.ac.th (P.P.)

<sup>2</sup> Department of Chemistry, Faculty of Science and Center of Excellence for Innovation in Chemistry, Naresuan University, Phitsanulok 65000, Thailand; nungruthais@nu.ac.th

<sup>3</sup> Science Laboratory Centre, Faculty of Science, Naresuan University, Phitsanulok 65000, Thailand; Nitran@nu.ac.th

<sup>4</sup> School of Human Development and Health, Faculty of Medicine, University of Southampton, Southampton SO16 6YD, UK; pcc@southampton.ac.uk

\* Correspondence: kanchanau@nu.ac.th; Tel.: +66-89-780-3878

## Supplementary Table S1. Primer sequences used in RT-qPCR assay.

| Primer name | Primer sequence Gene                                                       |
|-------------|----------------------------------------------------------------------------|
| Bcl-2       | Fw: 5' – GATGTGATGCCTCTGCGAAG – 3'<br>Rw: 5' – CTAGCTGATGTCTCTGGAATCT – 3' |
| Bax         | Fw: 5' – GGTGTGTCGCCCTTTTCTA – 3'<br>Rw: 5' – CGGAGGAAGTCCAATGTC – 3'      |
| p53         | Fw: 5' – GTTCCGAGAGCTGAATGAGG – 3'<br>Rw: 5' – TCTGAGTCAGGCCCTTCTGT – 3'   |
| β-actin     | Fw: 5' – AGAAAATCTGGCACCACACC – 3'<br>Rw: 5' – CCATCTCTTGCTCGAAGTCC – 3'   |

## Supplementary Figures

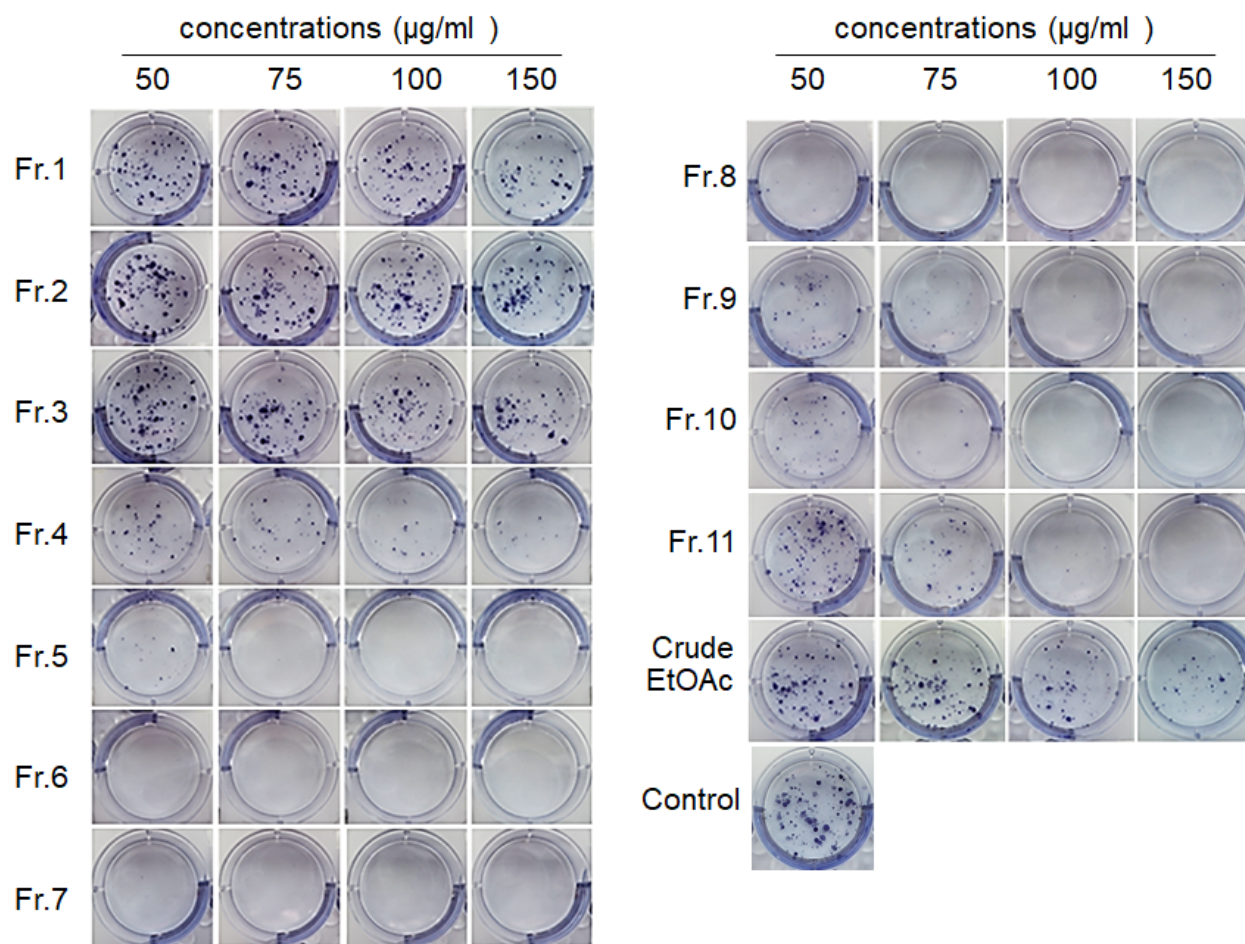

**Supplementary Figure S1.** Colony formation assay. MDA-MB-231 cells were treated with crude EtOAc extract and its fractions at concentration 50 – 150  $\mu\text{g/ml}$  for 24 h. Cells were then cultured for 14 days in complete medium to determine ability of a single cell to grow into a colony. EtOAc, ethyl acetate; Fr, fraction.

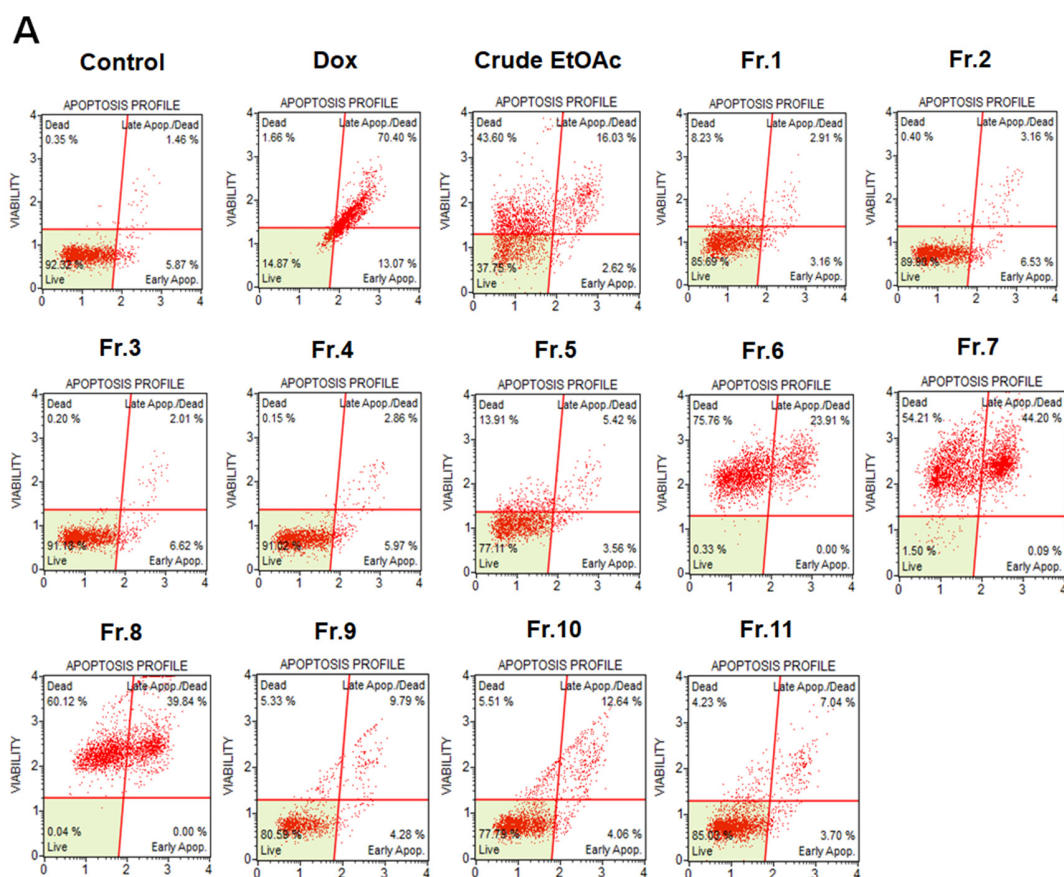

**Supplementary Figure S2.** Induction of apoptosis in MDA-MB-231 cells. Cells were incubated with crude EtOAc extract, 11 fractions (150  $\mu$ g/ml) or doxorubicin (1.5  $\mu$ M) for 24 h. For control, cells were incubated with complete medium alone. The upper-left quadrant (annexin V $^-$ , 7-AAD  $^+$ ) represent dead cells. The lower left quadrant (annexin V $^-$ , 7-AAD  $^-$ ) represent live cells. One-way ANOVA was performed with multiple comparison correction (Dunnnett test). EtOAc, ethyl acetate; Fr, fraction; Dox, doxorubicin; 7-AAD, 7-amino-actinomycin D.

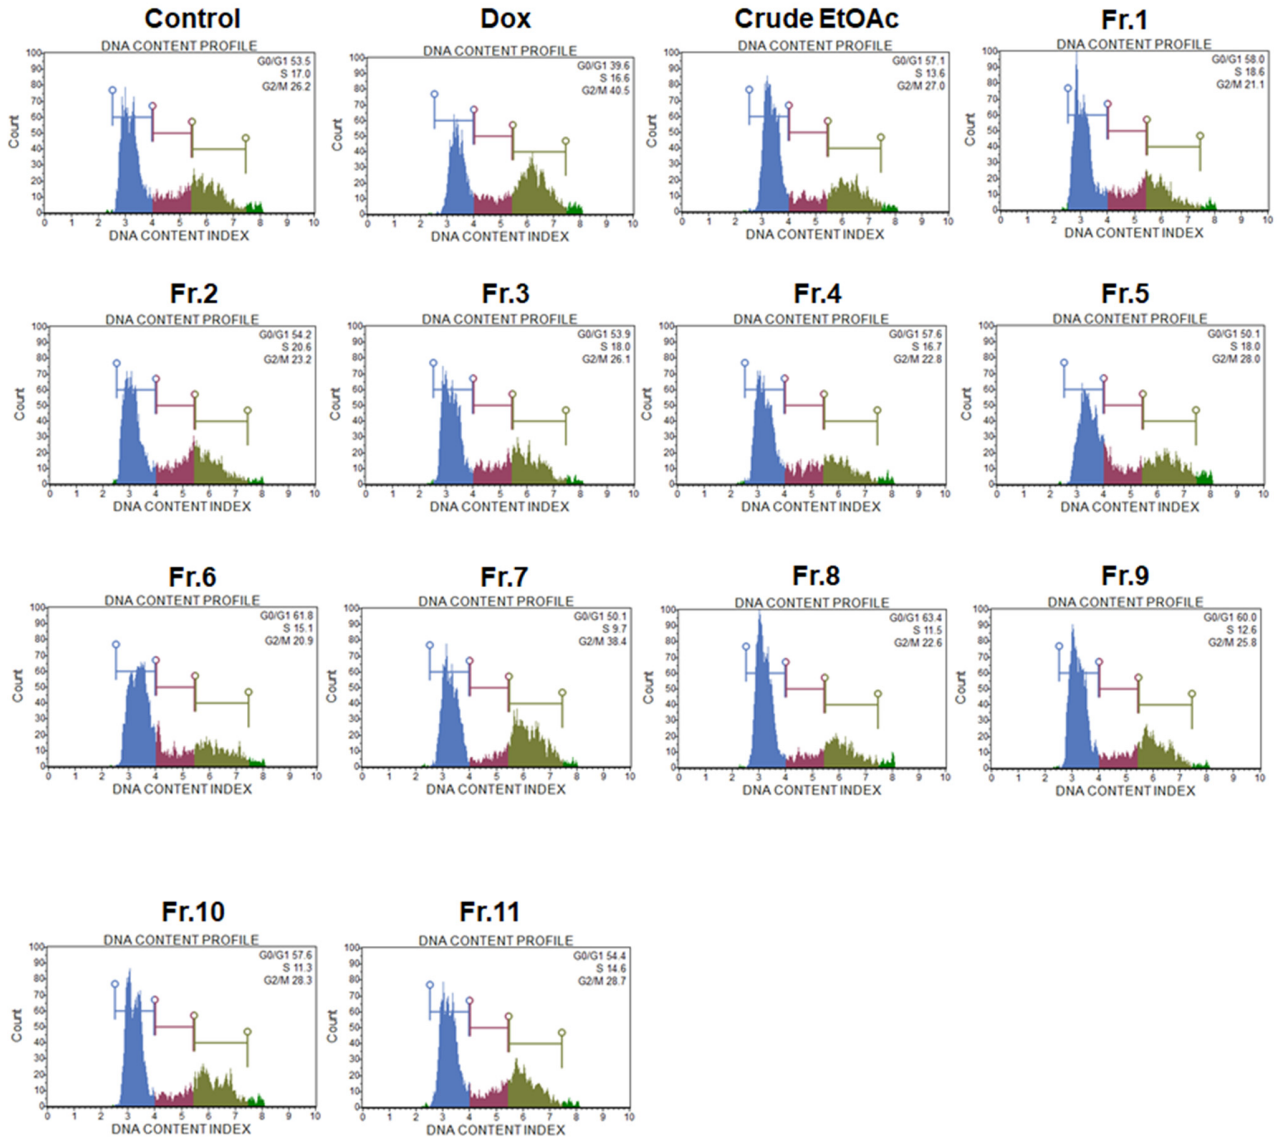

**Supplementary Figure S3.** Effect of MOL extract and its derived fractions on the distribution of MDA-MB-231 cells in the cell cycle. Cells were incubated with crude EtOAc extract, 11 fractions (150  $\mu\text{g/ml}$ ) or doxorubicin (1.5  $\mu\text{M}$ ) for 24 h. For control, cells were incubated with complete medium alone. EtOAc, ethyl acetate; Fr, fraction; Dox, doxorubicin.

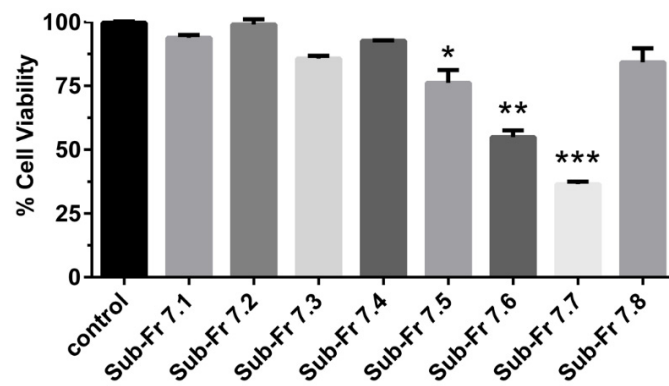

**Supplementary Figure S4.** Cell viability of MDA-MB-231 cells after treatment with sub-fractions no.7.1-7.8. Cells were incubated for 24 h with 75  $\mu\text{g/ml}$  of each sub-fraction. One-way ANOVA test was performed with multiple comparison corrections (Dunnett test). Data represent mean  $\pm$  SEM of three independent experiments. (\* $p < 0.05$ , \*\* $p < 0.01$ , \*\*\* $p < 0.001$ ). Fr, fraction

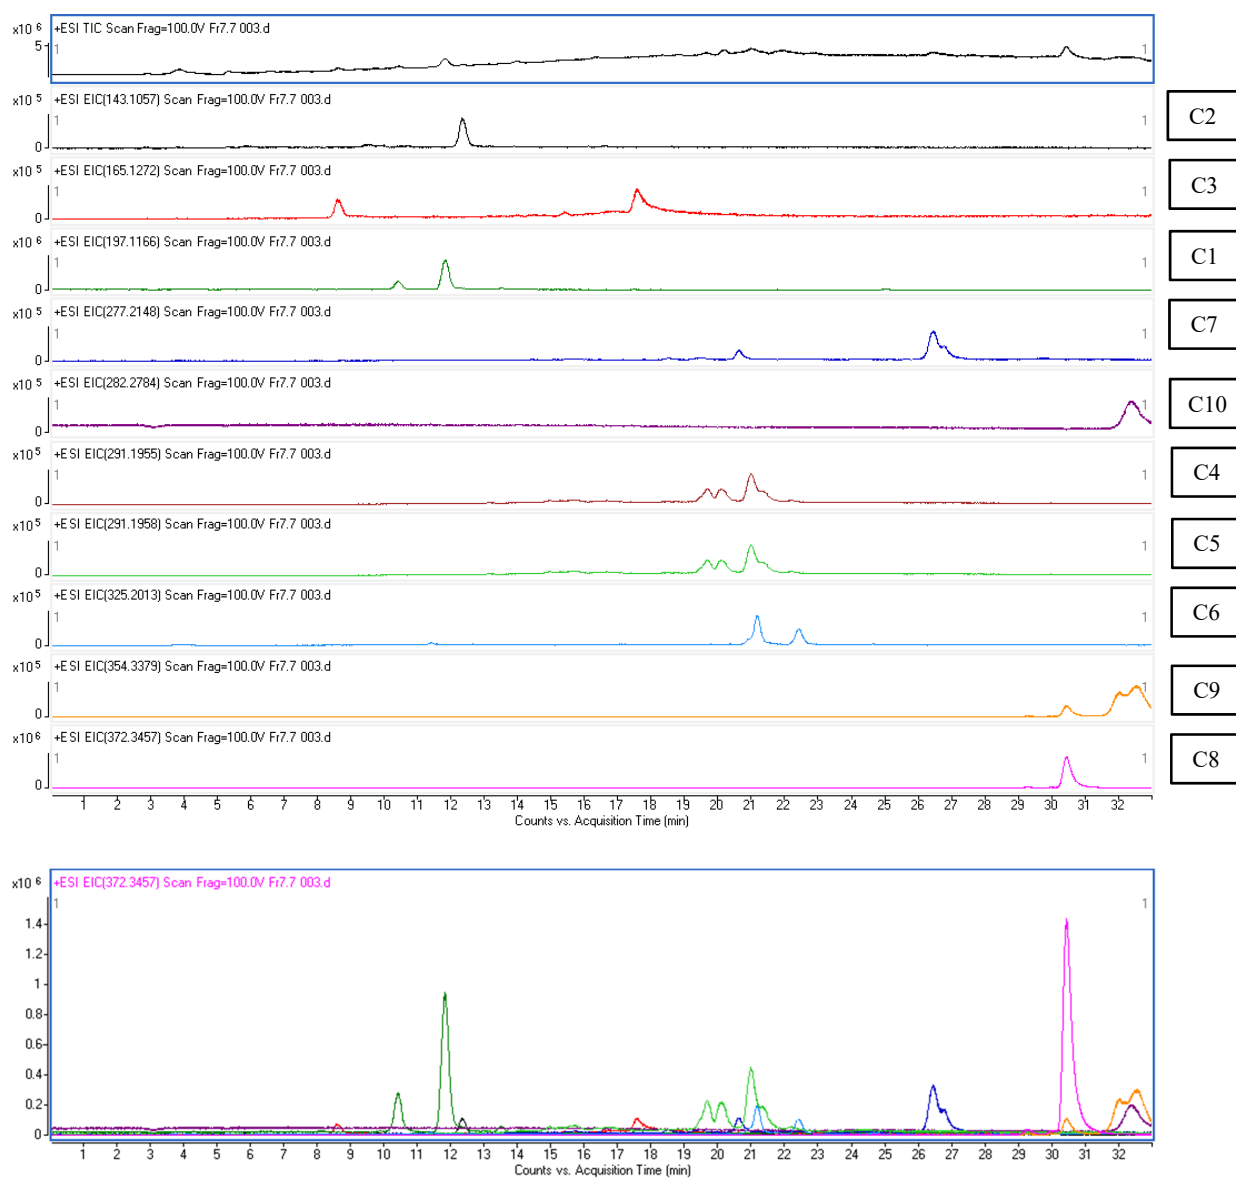

**Supplementary Figure S5.** Overlays of LC-MS chromatograms of MO sub-fraction no.7.7 with active compounds no.1-10.

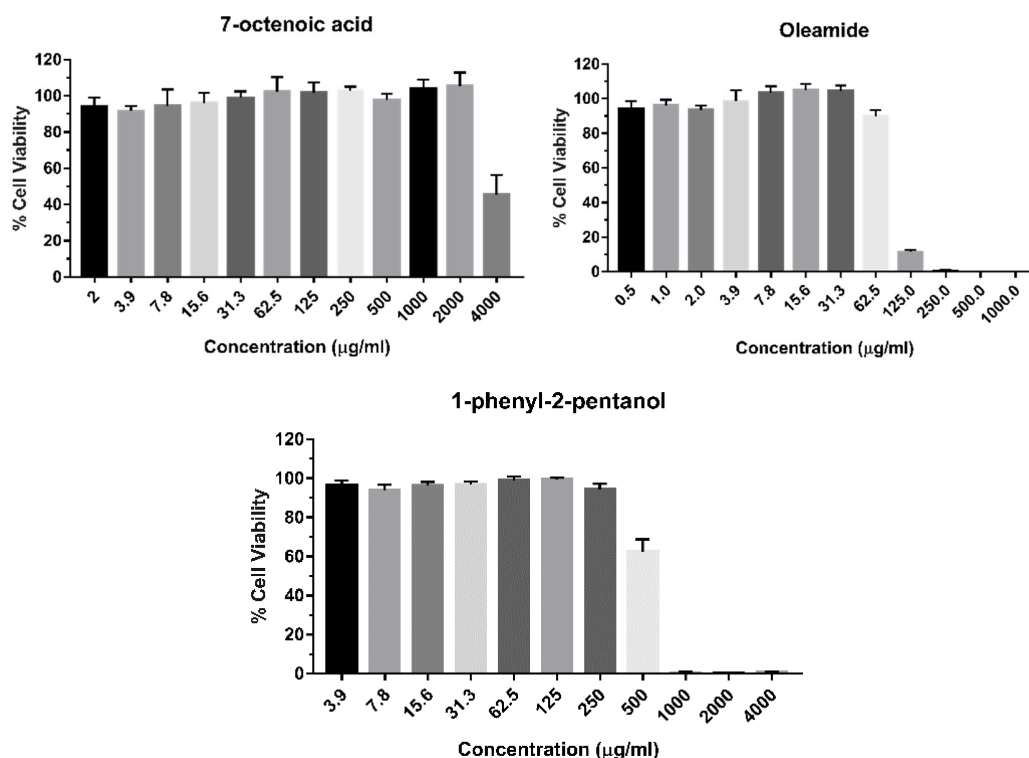

**Supplementary Figure S6.** Cytotoxicity of identified compounds on MDA-MB-231 cells. Cells were plated on 96-well plates and incubated with increasing concentrations of 7-octenoic acid, oleamide, and 1-phenyl-2-pentanol for 24 h. The viability was measured by using MTT assay. Each bar graph represents mean  $\pm$  SEM.

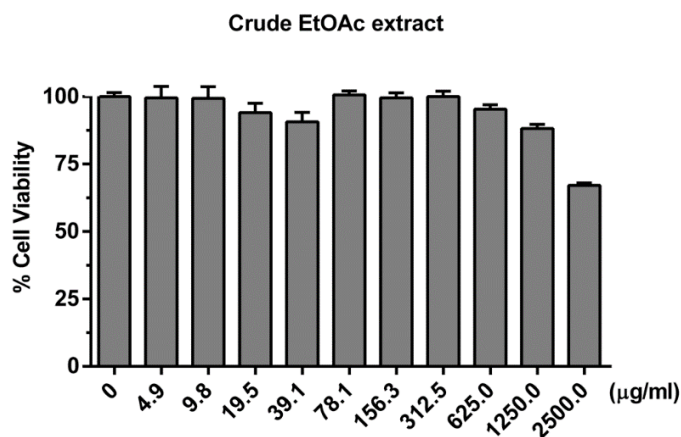

**Supplementary Figure S7.** Cell viability of primary human macrophage after treatment with crude EtOAc extract. Human macrophages were plated into 96 wells and incubated with increasing concentrations (0-2.5 mg/ml) of extract for 24 h. Cells viability was assessed by MTT assay. Data represent mean  $\pm$  SEM of three independent experiments.



**A**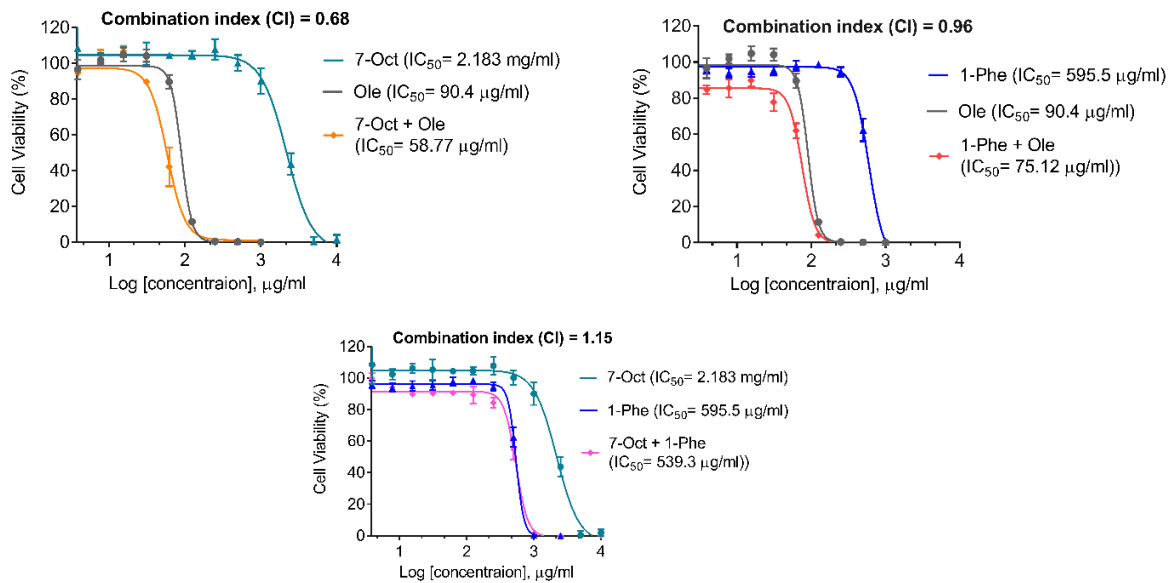**B**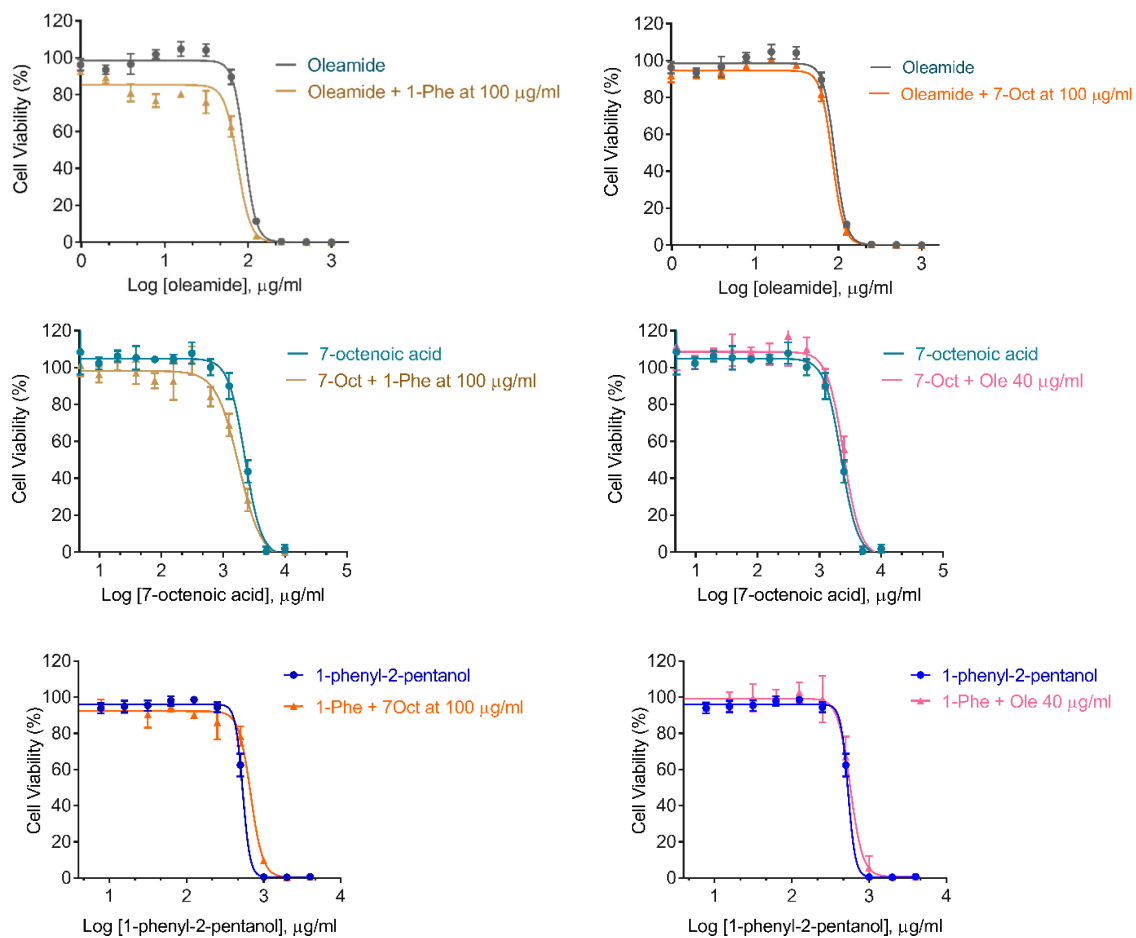



**Supplementary Figure S8.** Combination effect of compounds on MDA-MB-231 cell viability. (A) Cells were incubated with increasing concentration of compounds alone (7-Oct, Ole, and 1-Phe) or compound combinations (7-Oct + Ole, 1-Phe + Ole, and 7-Oct + 1-Phe). (B) Cells were incubated with increasing concentration of compounds alone or combined with 1-Phe (100 µg/ml), 7-Oct (100 µg/ml), or oleamide (40 µg/ml). Cells were incubated for 24 h in all experiment. The viability was measured by using MTT assay. Each bar graph represents mean  $\pm$  SEM of three independent experiments. 7-Oct, 7-octenoic acid; 1-Phe, 1-Phenyl-2-pentanol, Ole, oleamide. The combination index (CI) was calculated based on the IC<sub>50</sub> values obtained from the MTT assay by using the formula;

$$CI = [IC_{50}(A+B) / IC_{50}(A)] + [IC_{50}(A+B) / IC_{50}(B)]$$

where IC<sub>50</sub> (A) and IC<sub>50</sub> (B) are the IC<sub>50</sub> values obtained from each compound separately. IC<sub>50</sub> (A + B) is the IC<sub>50</sub> value of both compounds in combination.

Beta-actin (42 kDa)

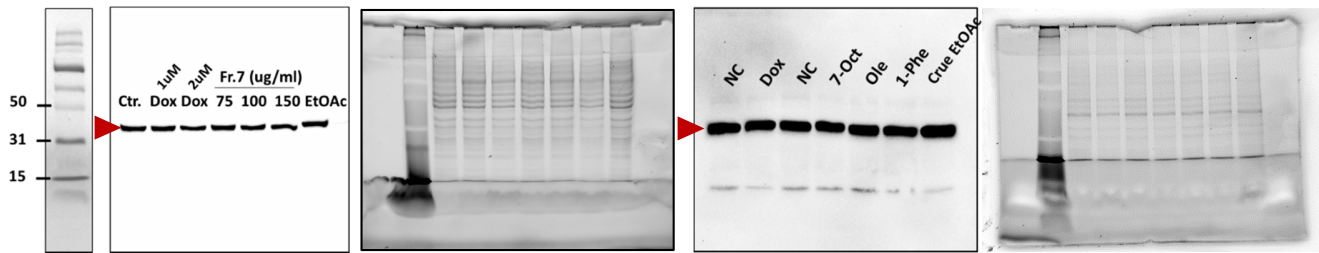

Bcl-2 (26 kDa)

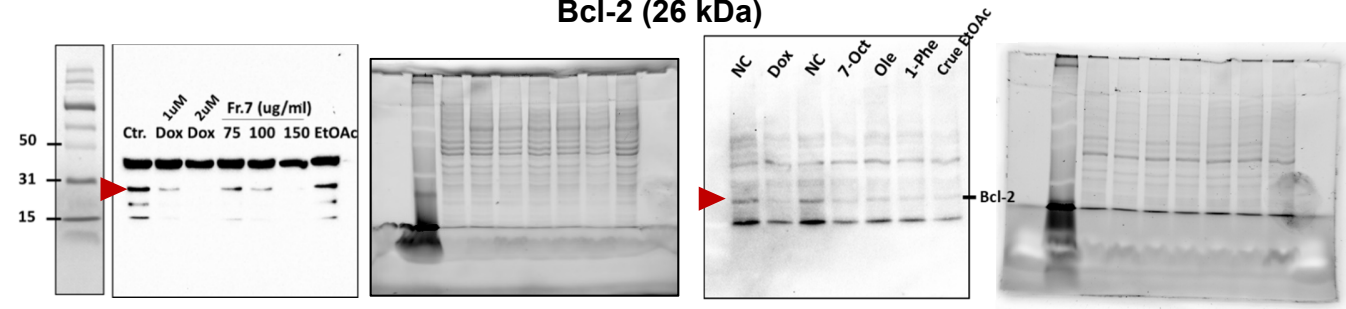

Bax (23 kDa)

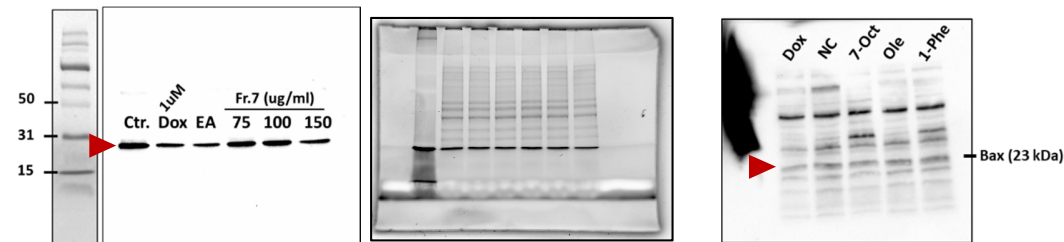

Pro-caspase 3 (32 kDa)

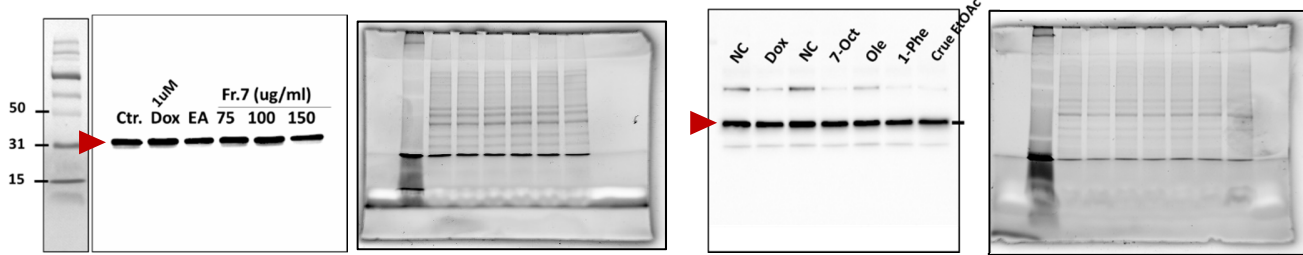

Cleaved caspase 3 (17 kDa)

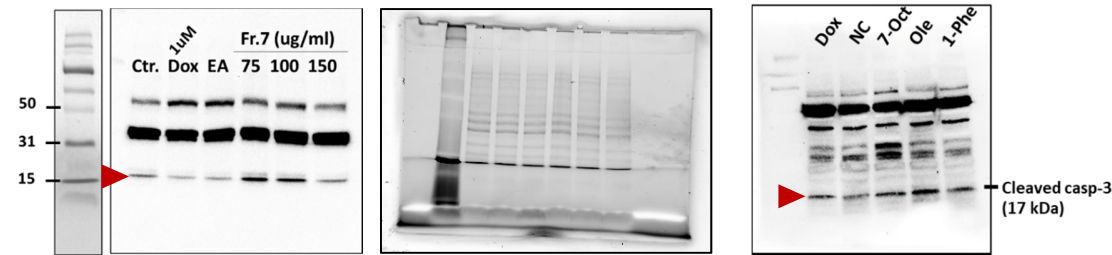

**Supplementary Figure S9.** Original Images of Blots and Gels. MDA-MB-231 cells were incubated with fraction no.7 or compounds for 24 h. The membranes were probed with Beta-actin, Bcl-2, Bax, pro-caspase 3, and cleaved caspase-3, respectively.
